# Supplementary material for: Thermally stable and color-tunable bi-activated (Dy3+/Eu3+) alkaline earth metasilicate phosphor for luminescent devices
Source: Royal Society of Chemistry journal article supplement (doi:10.1039/d3ra03229a), 2023-01-01
Supplement: d3ra03229a1.pdf [file d3ra03229a1.pdf]

## Electronic Supplementary Information (ESI)

### **Thermally stable and color-tunable bi-activated (Trivalent Dysprosium/ Europium) alkaline earth metasilicate phosphor for luminescent devices**

**Deepali, M. Jayasimhadri\***

*Luminescent Materials Research Lab, Department of Applied Physics, Delhi Technological  
University, Bawana Road, Delhi- 110 042, India.*

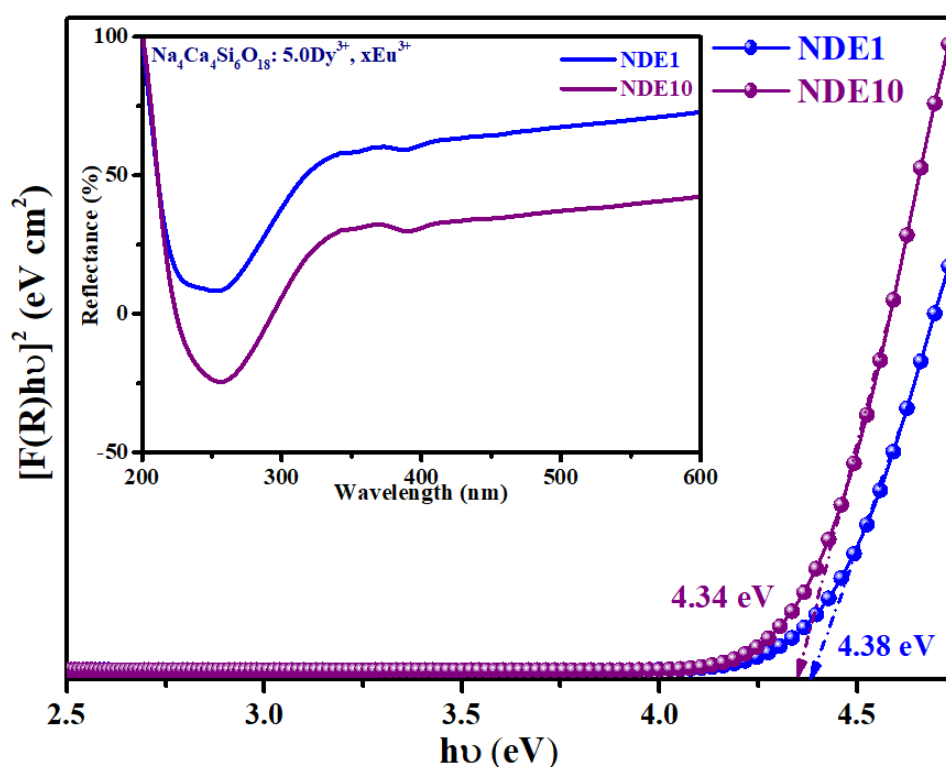

**Figure S1.** Band gap energy determination using K-M function for 5.0 Dy<sup>3+</sup>/xEu<sup>3+</sup> (x=1.0 and 10.0 mol%) co-doped Na<sub>4</sub>Ca<sub>4</sub>Si<sub>6</sub>O<sub>18</sub> phosphors. Inset shows the diffuse reflectance spectra for the same samples.

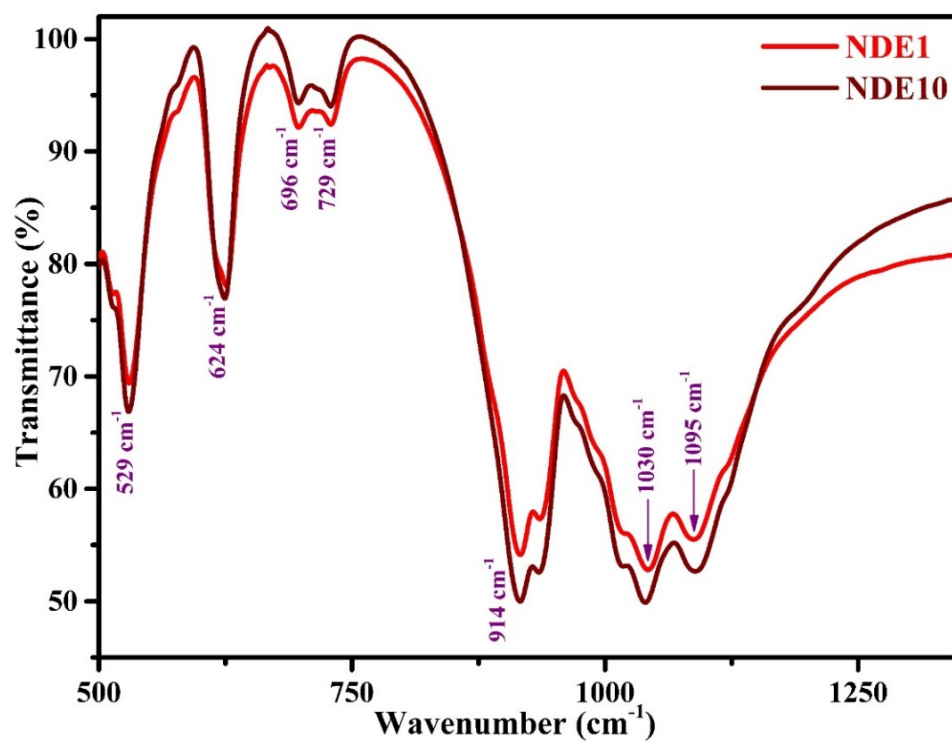

**Figure S2.** Fourier transform infrared spectroscopy of NCMS: 5.0  $\text{Dy}^{3+}$ /1.0  $\text{Eu}^{3+}$  (NDE1) and NCMS: 5.0  $\text{Dy}^{3+}$ /10.0  $\text{Eu}^{3+}$  (NDE10) phosphors.

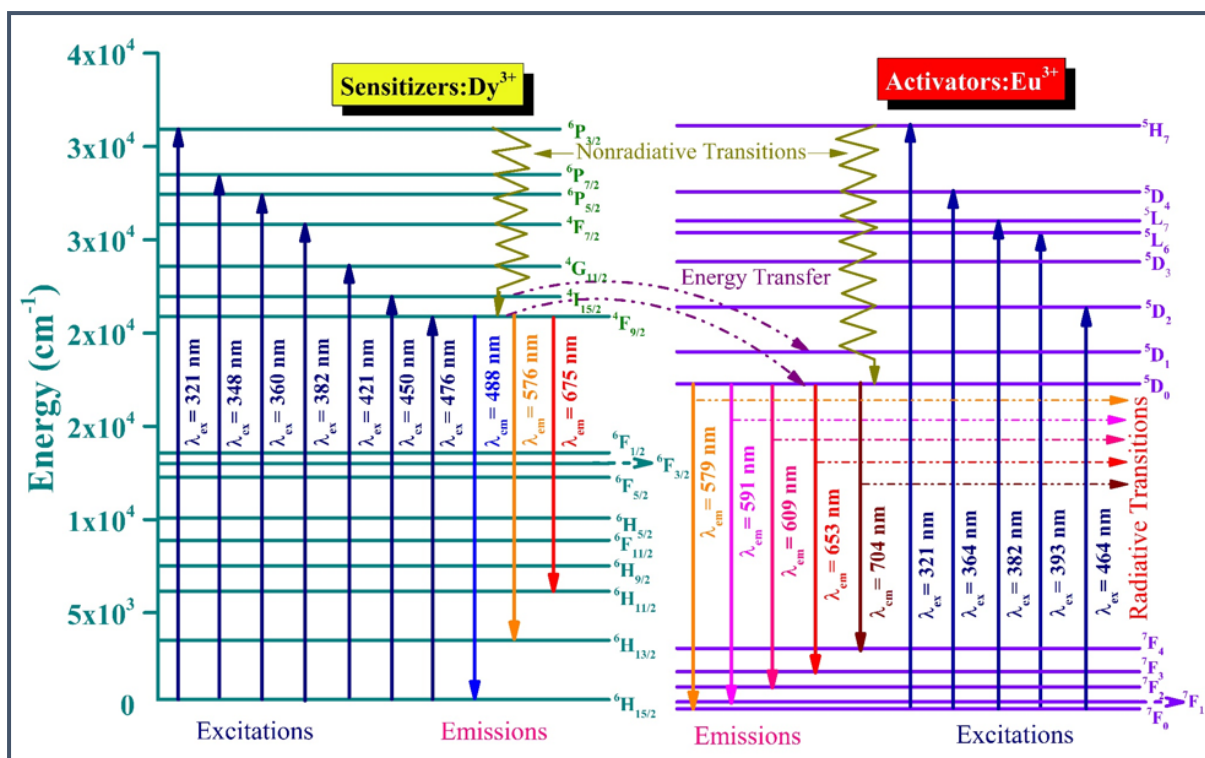

**Figure S3.** Partial energy level diagram illustrating energy transfer in  $\text{Dy}^{3+}$  activated and  $\text{Dy}^{3+}/\text{Eu}^{3+}$  co-activated  $\text{Na}_4\text{Ca}_4\text{Si}_6\text{O}_{18}$  phosphors.
